# Supplementary material
Source: MDPI journal article supplement (https://www.mdpi.com/2072-4292/12/7/1145)
Supplement: s1 [file s1]

Supplementary material

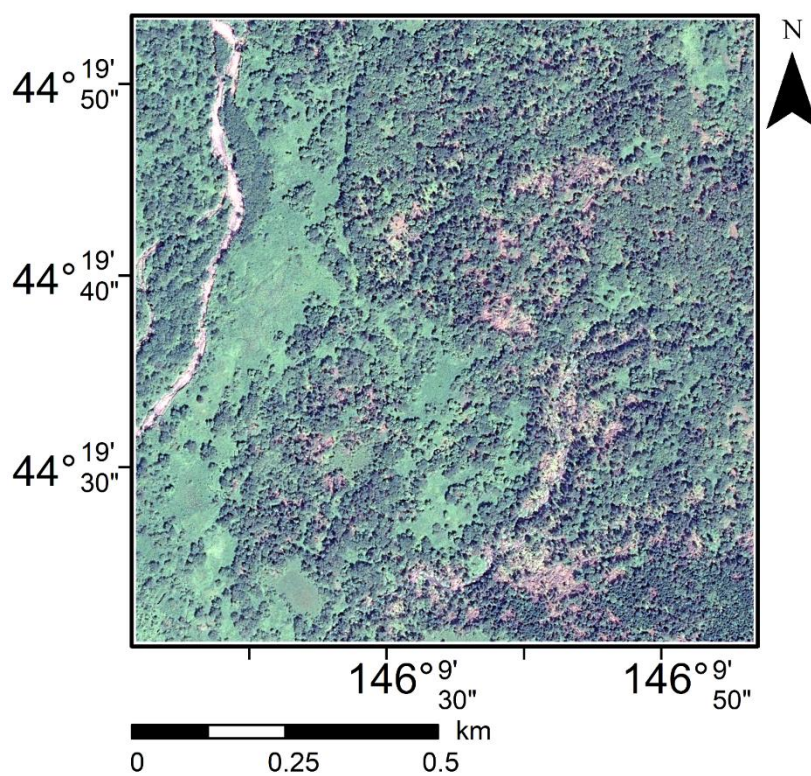

**Figure S1.** Satellite image of site #1.

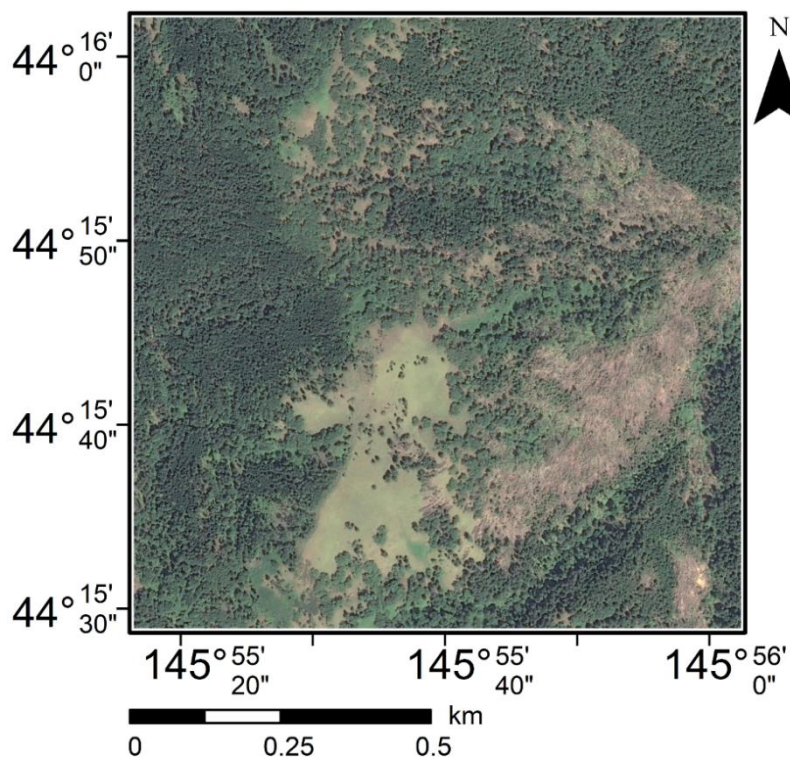

**Figure S2.** Satellite image of site #2.

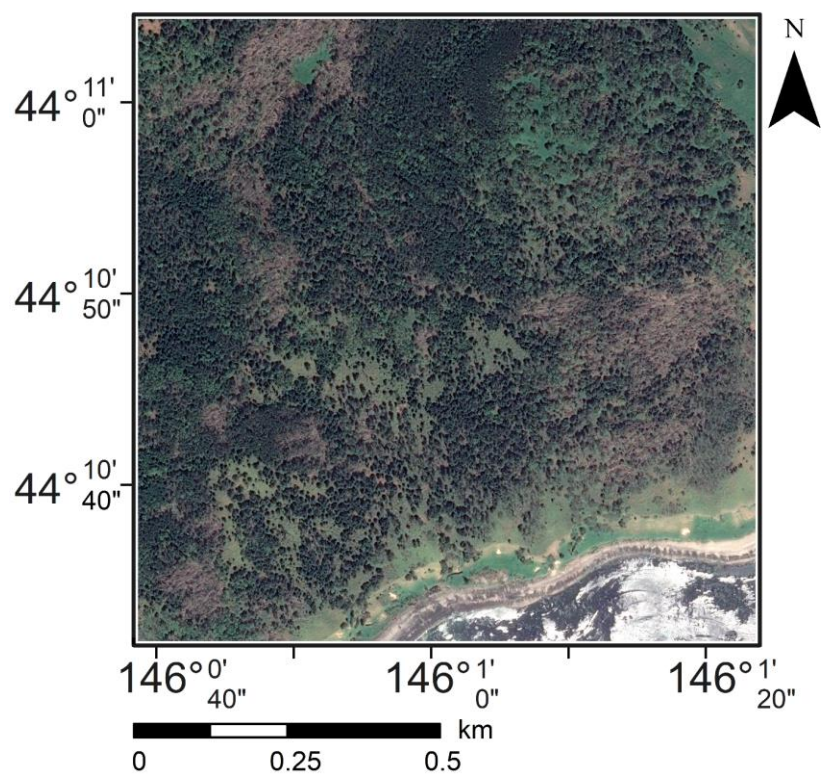

**Figure S3.** Satellite image of site #3.

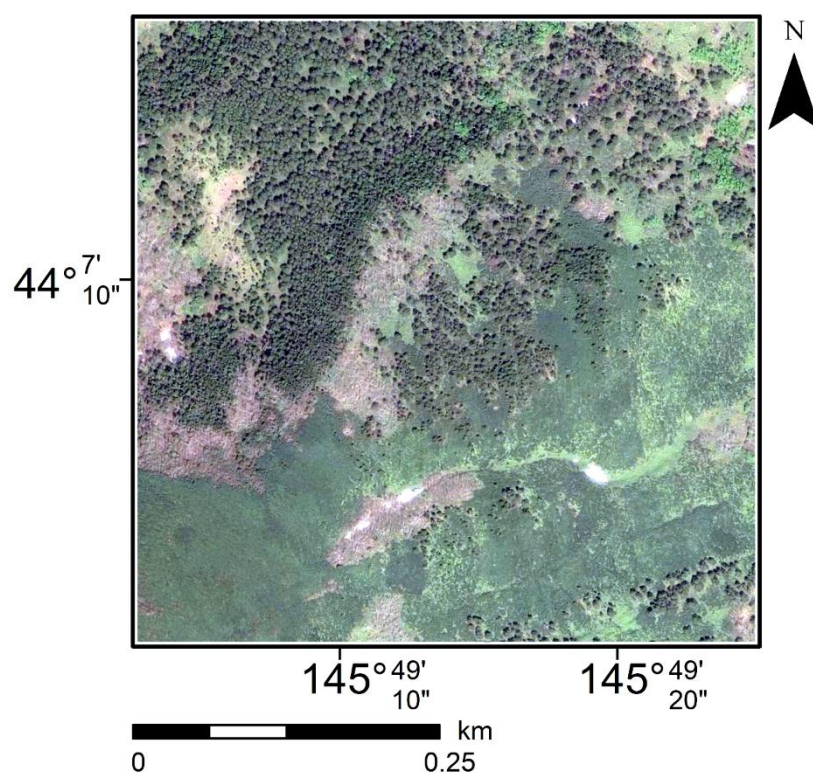

**Figure S4.** Satellite image of site #4.



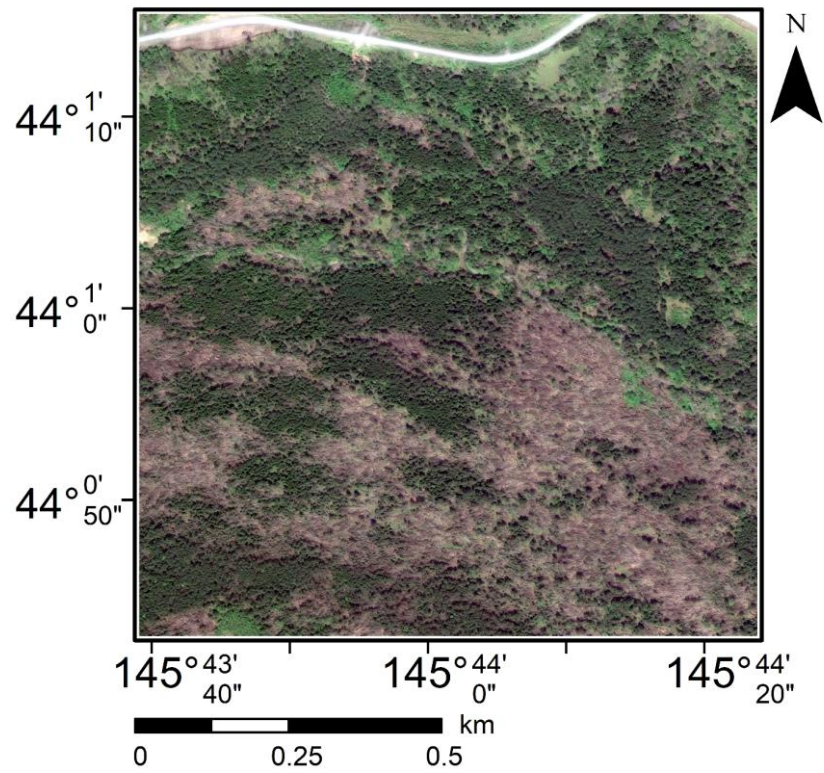

Figure S5. Satellite image of site #5.

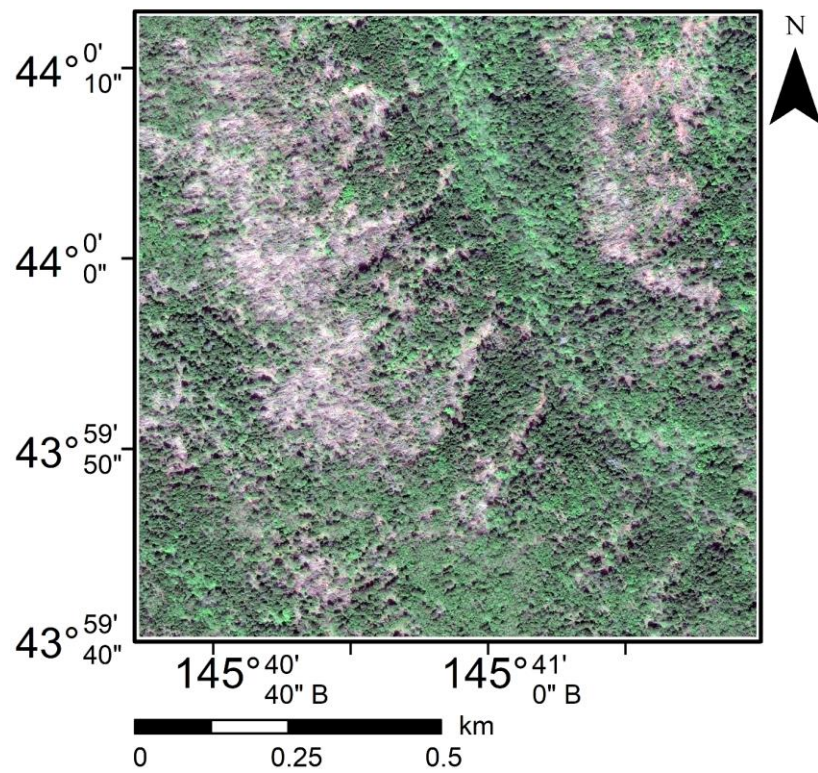

Figure S6. Satellite image of site #6.

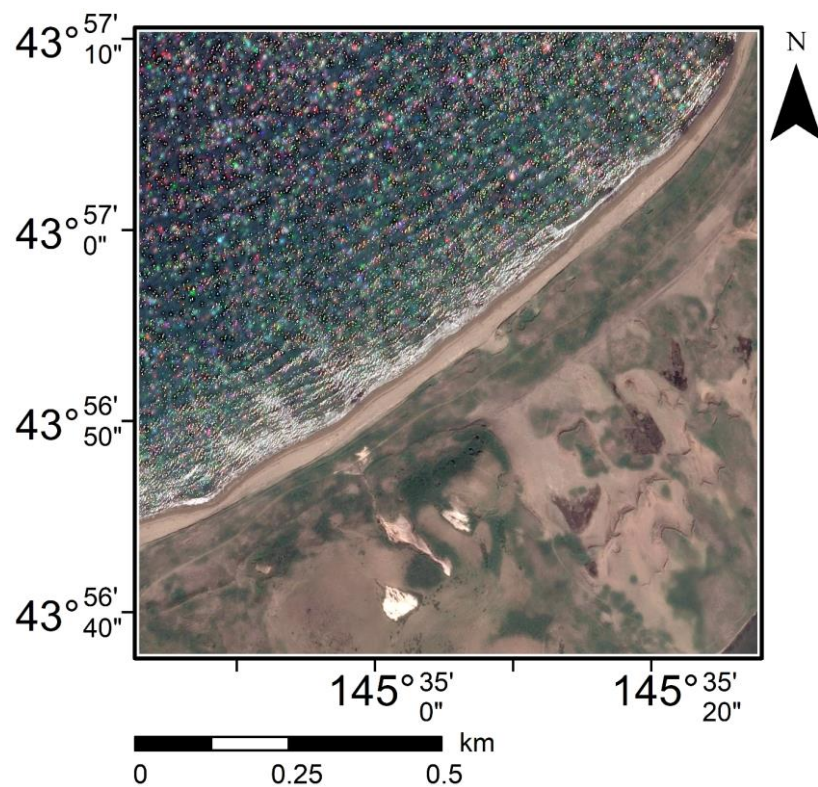

Figure S7. Satellite image of site #7.

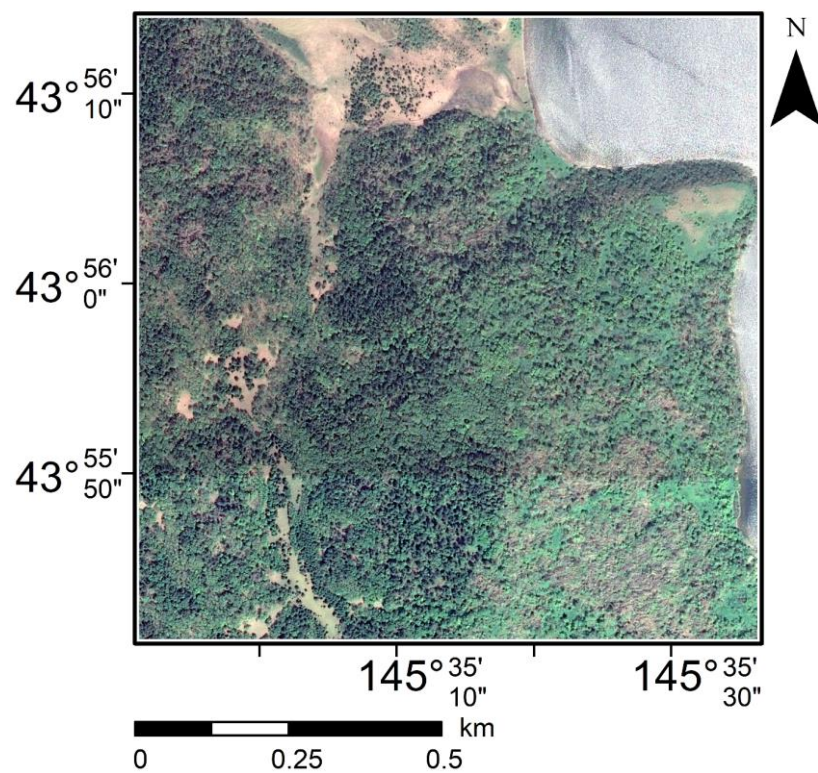

Figure S8. Satellite image of site #8.



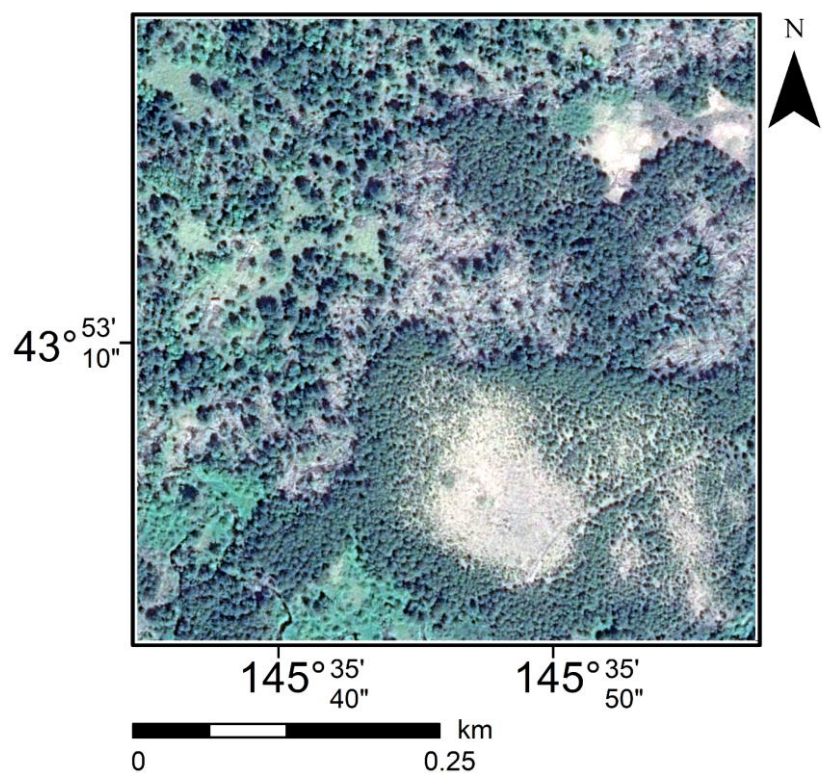

**Figure S9.** Satellite image of site #9.

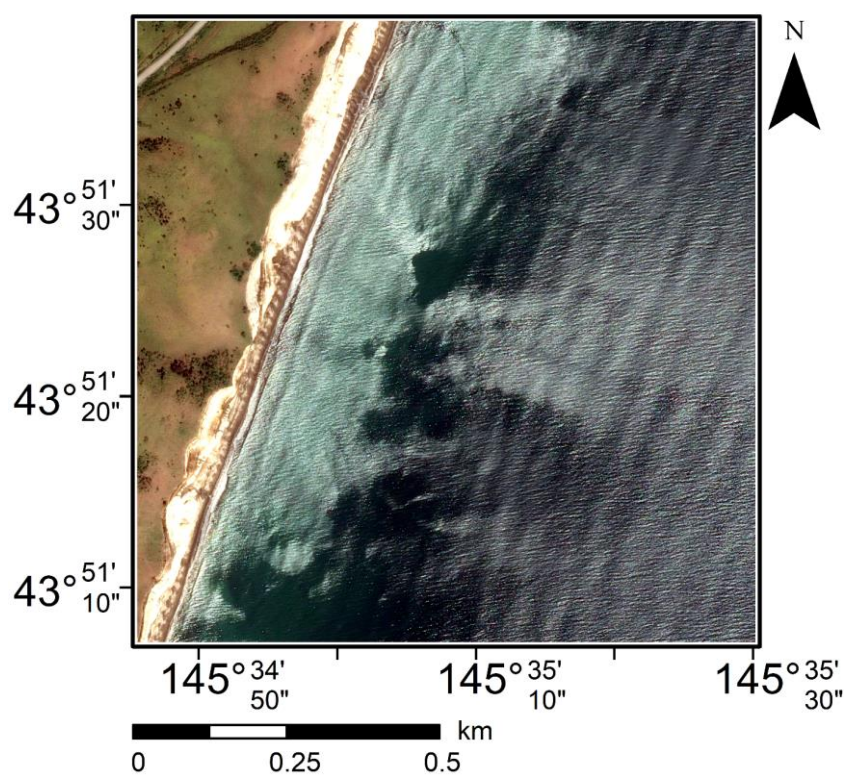

**Figure S10.** Satellite image of site #10.
